1 **Integrating Physiotherapy into Primary Care Models: A Scoping Review Protocol**

2 Nathaniel Saddy<sup>1</sup>, Aamir Aboosally<sup>1</sup>, Jordan Aslanidis<sup>1</sup>, Anthony Beilin<sup>1</sup>, Jessica da Silva

3 Schezar<sup>1</sup>, Jordan Miller<sup>1</sup>, Andrews K Tawiah<sup>2</sup>

4

5 <sup>1</sup> School of Rehabilitation Therapy, Faculty of Health Sciences, Queen’s University, Kingston,

6 Ontario, Canada

7 <sup>2</sup> School of Physical Therapy, Faculty of Health Sciences, Western University, London, Ontario,

8 Canada

9

10 \*Corresponding author

11 E-mail: [atawiah2@uwo.ca](mailto:atawiah2@uwo.ca) (AT)

12

13

14

15

16

17

18

19

## 20 **Abstract**

### 21 **Introduction**

22 Physiotherapists (PTs) working in primary care settings within an interprofessional team can lead  
23 to favourable health outcomes and decreased burden on the healthcare system. Although PT  
24 models of care are important to primary care delivery, there is a lack of knowledge and evidence  
25 on the characteristics of these models of care, the differences and similarities between the  
26 models, and the barriers and facilitators to implementing these models. This scoping review  
27 protocol aims to fill this knowledge gap by synthesizing the evidence and characteristics of  
28 models of care that integrate physiotherapists within primary care teams, mapping the  
29 similarities and differences, and describing barriers and facilitators to implementing models of  
30 care that integrate physiotherapists within primary care teams.

### 31 **Methods**

32 The scoping review is based on the Joanne Briggs Institute (JBI) framework. It is reported  
33 according to the Preferred Reporting Items for Systematic Reviews and Meta-Analyses extension  
34 for Scoping Reviews (PRISMA-ScR). A comprehensive search strategy will be used to find  
35 relevant papers in six databases: OVID MEDLINE, PubMed, Embase, CINAHL, Web of  
36 Science, and Scopus. Grey literature will be searched through OpenGrey, Theses Global,  
37 ProQuest Dissertation, and Google Scholar. Quantitative and qualitative study designs will be  
38 included, with two reviewers independently selecting each article on Covidence. Data will be  
39 extracted using a pre-piloted data extraction sheet and synthesized narratively to identify themes  
40 and patterns.

## 41 **Discussion**

42 This scoping review will synthesize the evidence on models of care that integrate  
43 physiotherapists within primary care teams. It will provide evidence to inform the  
44 implementation of these models of care and identify research gaps that need to be addressed.

45

46

47

48

49

50

51

52

53

54

55

56

57

58

## 59 **Introduction**

60 According to the World Health Organization, primary health care is a whole of society approach  
61 that aims to maximize the level and distribution of health and well-being [1]. Primary Health  
62 care comprises three components 1) primary care and essential public health functions as the  
63 core of integrated health services 2) multisectoral policy and action 3) empowered people and  
64 communities. Primary care models are usually described as the first-contact service for a patient,  
65 and the models are built on an interprofessional holistic approach aiming for patient-centred care  
66 [2]. In a seminal article by Barbara Starfield, primary care is described based on four attributes  
67 known as the “four C’s”: First contact, Continuity of care, Comprehensiveness, and Coordination  
68 of care [3, 4]. These attributes have been expanded upon through a multi-stakeholder consensus  
69 process to formulate seven shared principles of primary care: 1) Person centered 2) Continuous  
70 3) Comprehensive and equitable 4) Team-based and collaborative 5) Coordinated and integrated  
71 6) Accessible 7) High value care [5]. There is evidence that strong primary care, regardless of  
72 whether it is delivered by a primary care physician or a team of health professionals, can prevent  
73 illness, improve health outcomes, and promote a more equitable distribution of healthcare to the  
74 population compared to a specialty care model [6].

75         Physiotherapists (PTs) can prevent, assess, and treat injuries, pain, diseases or disorders  
76 and their impact on function, movement, and overall health [7]. PTs are competent to practice  
77 independently and as part of an interprofessional team from primary to tertiary care. These  
78 competencies allow PTs to effectively be part of a team-based approach, an ability that is  
79 essential in primary health care models focusing on patient-centred care. Evidence suggests that  
80 multiple PT interventions are beneficial for treating multi-system conditions often seen in  
81 primary care. PTs have in-depth knowledge of musculoskeletal conditions, chronic pain

82 management, and cardiorespiratory and neurological conditions, and these conditions are the  
83 areas of practice most commonly reported by PTs working in primary care [8]. PT services have  
84 demonstrated effectiveness in supporting people with several chronic conditions, including  
85 providing self-management support, activity counselling, and exercise prescription [8]. Recent  
86 studies have been conducted in Canada and Sweden to investigate PT models in primary care in  
87 specific health conditions and settings, such as orthopedic and low-back pain [9-11]. These  
88 studies found that PT models in primary care provided equal or better outcomes than usual care  
89 in primary care settings. However, these studies focused only on musculoskeletal (MSK)  
90 disorders.

91 The call for PTs in primary care has gotten more robust due to the challenges with access  
92 to primary care in multiple countries. Contributors to the lack of primary care access include  
93 staff shortages, service inequality by geographic regions, inefficient models of care that require  
94 referrals for certain primary care professionals, preparedness of healthcare providers, practitioner  
95 workload, and financial constraints [12]. In Canada, over 6.5 million people do not have access  
96 to primary care providers; this is 14.4% of the Canadian population [13], which is expected to  
97 grow. This has led to calls for interprofessional team-based models of primary care with  
98 physiotherapists as core members of the team. However, there is a lack of synthesized evidence  
99 on the models of care that integrate physiotherapists within primary care teams.

100 This scoping review protocol aims to fill this evidence gap by examining the evidence on  
101 the primary care models that integrate physiotherapists that have been implemented worldwide.  
102 This scoping review will identify and describe the characteristics of the models of care, mapping  
103 out the similarities and differences between the models. Further, this scoping review will identify  
104 the types of evidence available on models of primary care that integrate physiotherapists, which

105 will help identify where evidence exists to inform implementation and where important research  
106 gaps need to be addressed. Finally, it will synthesize evidence barriers and facilitators to the  
107 implementation of primary care models that involve the integration of physiotherapists within  
108 primary care models to provide essential evidence to support the development of implementation  
109 processes for team-based models of primary care that include physiotherapists.

110

111 **Review questions:** The specific review questions for this scoping review are:

- 112 1. What are the types of evidence available and gaps in evidence available related to  
113 primary care models that integrate physiotherapists within primary care teams?
- 114 2. What are the characteristics of primary care models that integrate physiotherapists  
115 and what are the similarities and differences between these primary care models?
- 116 3. What are the barriers and facilitators to implementing primary care delivery models  
117 that integrate physiotherapists within primary care teams?

118

119

120

121

122

123

124

125

126

127

128

129

130

131 **Methods**

132 This scoping review will follow the Joanna Briggs Institute (JBI) framework for scoping reviews  
133 [14], following updated methodological guidance for the conduct of scoping reviews, best  
134 practice guidance and reporting for the development of scoping review protocols and  
135 recommendations for the extraction, analysis of presentation of results in scoping reviews  
136 [15,16]. The protocol is reported in alignment with the Preferred Reporting Items for Systematic  
137 Reviews and Meta-Analyses extension for Scoping Reviews (PRISMA-ScR) [17]. The protocol  
138 is registered on Open Science Framework registries at <https://osf.io/kh83r/>.

139 **Inclusion Criteria**

140 The inclusion and exclusion criteria were designed based on the participants, concept, and  
141 context (PCC) framework described by the JBI Scoping Methodology Group [16]. Given that the  
142 focus of this scoping review is on models of health service delivery, participants were  
143 determined to be not a relevant inclusion criterion. The inclusion and exclusion criteria for this  
144 scoping review are presented in Table 1. The inclusion and exclusion criteria were designed to  
145 identify research related to the *concept* of interest (models of primary care that integrate  
146 physiotherapists within primary care teams) and the *context* (primary care settings anywhere in  
147 the world).

148 Table 1. Inclusion and Exclusion Criteria.

| <b>Inclusion Criteria</b>                                                                     | <b>Exclusion Criteria</b>                                                                                    | <b>Rationale</b>                                                                                               |
|-----------------------------------------------------------------------------------------------|--------------------------------------------------------------------------------------------------------------|----------------------------------------------------------------------------------------------------------------|
| The included studies will provide evidence of a model of care. As defined by the World Health | Studies that do not provide evidence on a model of care would be excluded. For example, research carried out | These inclusion and exclusion criteria will ensure the included studies are focused on <b>models of care</b> . |

|                                                                                                                                                                                                                                                                                                                                                      |                                                                                                                                                                                                                                                                                                                                                                       |                                                                                                                              |
|------------------------------------------------------------------------------------------------------------------------------------------------------------------------------------------------------------------------------------------------------------------------------------------------------------------------------------------------------|-----------------------------------------------------------------------------------------------------------------------------------------------------------------------------------------------------------------------------------------------------------------------------------------------------------------------------------------------------------------------|------------------------------------------------------------------------------------------------------------------------------|
| <p>Organization (WHO), a model of care is “a conceptualization and operationalization of how services are delivered, including the processes of care, organization of providers and management of services, supported by the identification of roles and responsibilities of different platforms and providers along the pathways of care [18].”</p> | <p>in a primary care setting but aiming to assess the outcomes of a specific intervention (e.g., a medication) rather than a model of care would be excluded. A second example is research carried out in primary care that focuses on testing the psychometric or diagnostic properties of an assessment tool for a specific condition, which would be excluded.</p> |                                                                                                                              |
| <p>A model of <b>primary care</b> (public or private). Primary care will be defined using Epperly’s shared principles of primary care, with emphasis on the following principles [5]:</p> <p>(1) continuous (or longitudinal) care</p>                                                                                                               | <p>Studies of a model of care that does not meet the definition or shared principles of primary care identified. For example, an emergency department does not typically offer longitudinal or comprehensive care, although it often includes interprofessional teams and is</p>                                                                                      | <p>These inclusion and exclusion criteria will ensure the studies included are focused on models of <b>primary care</b>.</p> |



|                                                                                                                                                                                                                                                                                                                                                                                    |                                                                                                                                                                                                                                                                                    |                                                                                            |
|------------------------------------------------------------------------------------------------------------------------------------------------------------------------------------------------------------------------------------------------------------------------------------------------------------------------------------------------------------------------------------|------------------------------------------------------------------------------------------------------------------------------------------------------------------------------------------------------------------------------------------------------------------------------------|--------------------------------------------------------------------------------------------|
| <p>(2) comprehensive care (the place in the health system where the average person turns for the majority of their routine healthcare needs)</p> <p>(3) Team-based and collaborative care (at least one other health profession involved in addition to the physiotherapist)</p> <p>(4) Accessible care (a setting where healthcare can be accessed directly without referral)</p> | <p>accessible as a ‘first-contact’ setting in most health systems.</p> <p>A private physiotherapy clinic may provide direct access and sometimes longitudinal care but does not often offer comprehensive health services that meet most of the average person’s health needs.</p> |                                                                                            |
| <p>Included studies will provide evidence on a primary care model</p>                                                                                                                                                                                                                                                                                                              | <p>Studies on primary care models that do not include a physiotherapist.</p>                                                                                                                                                                                                       | <p>These inclusion and exclusion criteria will ensure the studies included involve the</p> |

|                                                             |  |                                                                     |
|-------------------------------------------------------------|--|---------------------------------------------------------------------|
| involving a licensed or registered <b>physiotherapist</b> . |  | integration of a <b>physiotherapist</b> within a primary care team. |
|-------------------------------------------------------------|--|---------------------------------------------------------------------|

149

## 150 **Information Sources**

151 A literature search will be completed across six databases: OVID MEDLINE, PubMed, Embase,  
152 CINAHL, Web of Science, and Scopus. Grey literature will also be searched through Web of  
153 Science, OpenGrey, Theses Global, ProQuest Dissertation, Google Scholar, and central  
154 physiotherapy professional and organizational websites. Quantitative and qualitative study  
155 designs, primary research, and systematic reviews will all be included in the scoping review.

## 156 **Data Management**

157 Articles identified by the search will be imported and stored in COVIDENCE. The program will  
158 automatically remove duplicates. Title/abstract and full-text screening will be done through  
159 COVIDENCE, and full texts will be stored within the program.

## 160 **Search Strategy**

161 The search strategy aims to identify published and unpublished grey literature with findings that  
162 will help further our understanding of the evidence on primary care models of health service  
163 delivery that involve the integration of physiotherapists within primary care teams worldwide.  
164 One research librarian within the Health Sciences Faculty at Queens University was consulted to  
165 assist with the creation of this search strategy. A preliminary search was conducted on OVID  
166 MEDLINE using our *concept* and *context*: “Primary Care” and “Physiotherapist” as key terms,  
167 along with relevant synonyms. We conceptualize “primary care” as the setting and processes in

168 the health system that supports first-contact, accessible, continued, comprehensive and  
169 coordinated patient-focused care [1,3,5]. For the purposes of our inclusion criteria, we  
170 differentiate this from primary health care, which is a whole-of-society approach to health that  
171 aims to maximize the level and distribution of health and well-being through three components:  
172 primary care, essential public health functions, policy and action, and empower people and  
173 communities [1]. However, we acknowledge that these terms are often used synonymously in the  
174 literature and, therefore, have included “primary health care” as a synonymous search term to  
175 ensure we don’t miss relevant articles. Additional terms such as “First Contact” and “Advanced  
176 Practice” were incorporated to capture different representations of the “Primary Care” concept.  
177 Additional keywords were derived from the abstracts and titles of relevant studies from this  
178 preliminary search. These keywords are listed below in Table 2. Using these keywords and  
179 medical subject headings, six databases will be searched: OVID MEDLINE, PubMed, Embase,  
180 CINAHL, Web of Science, and Scopus. The search strategy will be modified for each unique  
181 database.

182 Table 2. Keywords used in the search strategy.

| <b>“Physiotherapy” descriptors</b> | <b>“Primary Care” descriptors</b>                                                                                                                                                                                                                   |
|------------------------------------|-----------------------------------------------------------------------------------------------------------------------------------------------------------------------------------------------------------------------------------------------------|
| Physiotherap*<br>Physical Therap*  | Primary care, Primary health care, Primary<br>Medical Care, Primary Care Model, Patient<br>Care Team, Family Health Team,<br>community health center, patient medical<br>home, patient’s medical home patient<br>centered medical home, health home |

183

184 All relevant literature published between 2003-Current in English and French will be  
185 considered in our search. These criteria were chosen based on the rationale of including the two  
186 main languages in the research team’s residing country (Canada) and attempting to include a  
187 broad range of studies that accommodate the team’s resources. The date criteria were selected  
188 because primary care models have undergone significant reform within the last decade in Canada  
189 and worldwide [18]. Therefore, the literature before 2003 may be scarcer and less relevant than  
190 recent studies.

191 A sample search strategy is provided in Table 3 below. As per the JBI search strategy  
192 recommendations, the reference lists of all identified articles will be screened to find any  
193 additional studies related to the research question. Finally, a grey literature search will also be  
194 conducted to capture information about our research question that is not represented in existing  
195 publications. Databases such as Web of Science, OpenGrey, Theses Global, ProQuest  
196 Dissertation, and Google Scholar will all be searched using a combination of the mentioned  
197 keywords. Finally, the websites of major professional and national physiotherapy organizations  
198 will be explored for further documentation of PT models of care in primary health settings.

199 Table 3. Sample Search Strategy Conducted July 2023 in OVID Medline.

| Search | Query                                                                                                                                                                                                                                                                        | Results |
|--------|------------------------------------------------------------------------------------------------------------------------------------------------------------------------------------------------------------------------------------------------------------------------------|---------|
| #1     | “Physical therap*” or “Physiotherap*”                                                                                                                                                                                                                                        | 92523   |
| #2     | (“primary care” or “Primary health care” or “care, primary” or “care, primary health” or “healthcare, primary” or “primary care model” or “primary medical care” or “first contact” or “patient care team” or “family health team” or “community health center” or “model of | 286189  |

|    |                                                                                                                                      |      |
|----|--------------------------------------------------------------------------------------------------------------------------------------|------|
|    | care” or “models of care” or “patient medical home” or “patient’s medical home” or “patient centered medical home” or “health home”) |      |
| #3 | #1 and #2                                                                                                                            | 4504 |

200

## 201 **Study selection**

202 Four members of the research team will take part in the selection process. Each article will have  
203 two reviewers independently review the titles and abstracts via COVIDENCE. Screening and  
204 eligibility for further review will be determined based on whether the articles presented meet the  
205 inclusion criteria. Articles will be included in the full-text review if both reviewers agree that  
206 they meet or may meet the eligibility based on the title and abstract. Articles will be excluded if  
207 both reviewers agree, based on the title and abstract, that the article does not meet the inclusion  
208 criteria. Articles identified as potentially meeting the inclusion criteria will undergo a full-text  
209 review, using two independent reviewers to agree on inclusion or exclusion in the scoping  
210 review. Any disagreements at either the title and abstract or full-text review phases will be  
211 discussed between the two independent reviewers with the goal of reaching a consensus decision.  
212 A third reviewer will be consulted to resolve the disagreement if an agreement is not reached. A  
213 narrative and flow diagram aligned with the PRISMA-ScR guidance will summarize the study  
214 selection process [19].

## 215 **Data extraction**

216 Two independent reviewers will extract Data from the articles in the scoping review using a data  
217 extraction tool developed and pre-piloted by the review team. Any disagreements arising  
218 between the reviewers extracting the data will be resolved through discussion or consultation

219 with an additional reviewer if needed. The data extracted will include details about the study  
220 design and methods, characteristics of the primary care model, context, participants, outcomes (if  
221 relevant), barriers and facilitators to implementation (if relevant), and other key findings relevant  
222 to the review questions.

223 Table 4 includes a draft extraction form. The draft data extraction tool has been pilot-tested using  
224 a preliminary search and revised based on its usability. The data extraction form will be modified  
225 as necessary throughout the extraction process from each included article. Any modifications  
226 made will be reported in the scoping review. Authors of papers will be contacted to request  
227 missing or additional data, where required.

## 228 **Data analysis and presentation**

229 For objective 1, the objectives/questions, design, methods, and findings of each included article  
230 will be mapped and reported using a table format that includes columns for study design, study  
231 objectives/questions, population, outcomes (if relevant), and key findings. A narrative synthesis  
232 will accompany the tabulated results. The question/objectives and findings will be critically  
233 analyzed to identify the types of evidence available to guide the implementation of models of  
234 primary care that include physiotherapists within primary care teams and evidence gaps that need  
235 to be addressed through further research. This critical analysis will be reported narratively.

236 For objective 2, characteristics of the primary care models that integrate physiotherapists within  
237 primary care teams will be reported in a table format. The characteristics will be analyzed to  
238 identify similarities and differences across the models of care identified and this analysis will be  
239 presented using a narrative synthesis to accompany the tabular results.

240 For objective 3, barriers and facilitators to implementing primary care models that integrate  
241 physiotherapists extracted from studies that investigate barriers and facilitators will be analyzed  
242 using directed content analysis using the revised Consolidated Framework for Implementation  
243 Research (CFIR) [20]. Results will be presented diagrammatically with an accompanying  
244 narrative synthesis. This analysis aims to identify factors influencing the implementation of  
245 primary care models that integrate physiotherapists within primary care teams [19].

246

247 Table 4. Example Data Extraction Form.

| Study title | Year | Country | Research question or objective | Study Design | Setting | Patient sample characteristics | Characteristics of the model of care | Facilitators | Barriers | Findings |
|-------------|------|---------|--------------------------------|--------------|---------|--------------------------------|--------------------------------------|--------------|----------|----------|
|             |      |         |                                |              |         |                                |                                      |              |          |          |
|             |      |         |                                |              |         |                                |                                      |              |          |          |



## **Discussion**

This scoping review will outline the existing literature on primary care models that involve the integration of physiotherapists within primary care teams. The findings will synthesize evidence available to guide the implementation of models of primary care that involve the integration of physiotherapists and highlight gaps in evidence that need to be addressed. The findings will also include a description of the characteristics of the models of care that involve the integration of physiotherapists in primary care, with an analysis of similarities and differences across models of care. Finally, the review will identify barriers and facilitators to implementing models of care that involve the integration of physiotherapists within primary care teams, which is anticipated to provide important evidence to inform the implementation of similar models of care in the future. The findings related to each of the three objectives will provide insight into models of team-based primary care that leverage the expertise of physiotherapists, which is gaining attention worldwide.

## **Authors' contributions**

AT and JM developed the project's concept. All team members contributed equally to developing the protocol, piloting the search strategy, and developing the data extraction sheet. NS coordinated the writing of the first draft of the manuscript, and AT and JM revised the manuscript and provided supervision and support for the project.

## **Acknowledgements**

We would like to thank Abdul Pullattayil, librarian at Queen's University, for his advice concerning our search strategy.

## **Supporting Information**

(Preferred Reporting Items for Systematic Review and Meta-Analysis Protocols)

## References

1. World Health Organization. A vision for primary health care in the 21st century [Internet]. www.who.int. Available from: <https://www.who.int/publications/i/item/WHO-HIS-SDS-2018.15>
2. Dufour SP, Lucy SD, Brown JB. Understanding Physiotherapists' Roles in Ontario Primary Health Care Teams. *Physiotherapy Canada*. 2014;66(3):234-242. doi:[10.3138/ptc.2013-22](https://doi.org/10.3138/ptc.2013-22)
3. Starfield B. Primary care and health. In: Isaacs SL, Knickman JR, editors. Generalist medicine and the U.S. health system. San Francisco, CA: Jossey-Bass; 1991. pp. 187–96.
4. Starfield B. Primary care. Balancing health needs, services and technology. New York, NY: Oxford University Press; 1998
5. Epperly T, Bechtel C, Sweeney R, Greiner A, Grumbach K, Schilz J, et al. The Shared Principles of Primary Care: A Multistakeholder Initiative to Find a Common Voice. *Family Medicine* [Internet]. 2019 Feb 8;51(2):179–84. Available from: <https://journals.stfm.org/media/2051/epperly-2018-0288.pdf>
6. Starfield B, Shi L, Macinko J. Contribution of primary care to health systems and health. *Milbank Q*. 2005;83(3):457-502. doi:10.1111/j.1468-0009.2005.00409.x
7. NPAG - Competency Profile for Physiotherapists in Canada. College of Physiotherapists of Ontario. 2017. Accessed August 21, 2023. [https://www.collegept.org/docs/default-source/default-document-library/essentialcompetencyprofile2009.pdf?sfvrsn=614fc9a1\\_2](https://www.collegept.org/docs/default-source/default-document-library/essentialcompetencyprofile2009.pdf?sfvrsn=614fc9a1_2).

8. Vader K, Ashcroft R, Bath B, et al. Physiotherapy Practice in Primary Health Care: A Survey of Physiotherapists in Team-Based Primary Care Organizations in Ontario. *Physiother Can.* 2022;74(1):86-94. doi:[10.3138/ptc-2020-0060](https://doi.org/10.3138/ptc-2020-0060)
9. Samsson KS, Bernhardsson S, Larsson MEH. Perceived quality of physiotherapist-led orthopedic triage compared with standard practice in primary care: a randomized controlled trial. *BMC Musculoskeletal Disorders.* 2016;17(1). doi:[10.1186/s12891-016-1112-x](https://doi.org/10.1186/s12891-016-1112-x)
10. Miller J, Barber D, Donnelly C, et al. Determining the impact of a new physiotherapist-led primary care model for back pain: protocol for a pilot cluster randomized controlled trial. *Trials.* 2017;18(1). doi:[10.1186/s13063-017-2279-7](https://doi.org/10.1186/s13063-017-2279-7)
11. Vader K, Donnelly C, French SD, et al. Implementing a new physiotherapist-led primary care model for low back pain: a qualitative study of patient and primary care team perspectives. *BMC Primary Care.* 2022;23(1). doi:[10.1186/s12875-022-01817-5](https://doi.org/10.1186/s12875-022-01817-5)
12. Boerma W, Bourgueil Yann Y, Cartier T, Hasvold T, Hutchinson A, Kringos D, et al. Overview and future challenges for primary care [Internet]. *U.S. National Library of Medicine*; 2015. Accessed on May 18, 2024. Available from: <https://www.ncbi.nlm.nih.gov/books/NBK458729/>
13. Government of Canada SC. Access to health care [Internet]. [www150.statcan.gc.ca](http://www150.statcan.gc.ca). 2023. Accessed May 12, 2024. Available from: <https://www150.statcan.gc.ca/n1/pub/82-570-x/2023001/section3-eng.htm>
14. Aromataris E, Lockwood C, Porritt K, Pilla B, Jordan Z, editors. *JBIM Manual for Evidence Synth*; 2024. Available from <https://doi.org/10.46658/JBIMES-24-01>

15. Peters MDJ, Godfrey C, McInerney P, et al. Best practice guidance and reporting items for the development of scoping review protocols. *JBI Evidence Synth.* 2022;20(4):953-968. doi:[10.11124/JBIES-21-00242](https://doi.org/10.11124/JBIES-21-00242)
16. Pollock D, Peters MDJ, Khalil H, et al. Recommendations for the extraction, analysis, and presentation of results in scoping reviews. *JBI Evid Synth.* 2023 Mar 1;21(3):520-532. doi: 10.11124/JBIES-22-00123.
17. Tricco AC, Lillie E, Zarin W, et al. PRISMA Extension for Scoping Reviews (PRISMA-ScR): Checklist and Explanation. *Ann Intern Med.* 2018;169(7):467-473. doi:[10.7326/M18-0850](https://doi.org/10.7326/M18-0850)
18. Operational framework for primary health care: transforming vision into action. Geneva: World Health Organization and the United Nations Children's Fund (UNICEF), 2020. Available from <https://www.who.int/publications/i/item/9789240017832>
19. Popay, J., Roberts, H., Sowden, A., et al. Guidance on the conduct of narrative synthesis in systematic reviews. A product from the ESRC methods programme Version. 2006; 1(1), b92
20. Damschroder, L.J., Aron, D.C., Keith, R.E. et al. Fostering implementation of health services research findings into practice: a consolidated framework for advancing implementation science. *Implementation Sci* 4, 50 (2009). <https://doi.org/10.1186/1748-5908-4-50>
